# Supplementary material for: Desminopathy: Novel Desmin Variants, a New Cardiac Phenotype, and Further Evidence for Secondary Mitochondrial Dysfunction
Source: PubMed Central journal article supplement (PMC7231262; doi:10.3390/jcm9040937), 2020-03-29
Supplement: jcm-09-00937-s001.pdf [file jcm-09-00937-s001.pdf]

## **SUPPLEMENTARY MATERIALS**

### **SUPPLEMENTARY METHODS:**

#### **Molecular-genetic analysis**

Genomic DNA of all available individuals was extracted from peripheral blood leukocytes using a standard technology. WES was performed on 1 µg of DNA in all individuals tested. For DNA enrichment, barcoded DNA libraries and SeqCap EZ MedExome Target Enrichment Kit (SeqCap EZ MedExome Probes used with mitochondrial genome design, Roche, Madison, USA) were used according to the manufacturer's protocol. MPS was performed on the captured barcoded DNA library using the Illumina HiSeq 2500 system at the genomic facility at the National Coordination Centre for Rare Diseases ([www.nkcvo.cz](http://www.nkcvo.cz)) at Motol University Hospital; Prague. The resulting FASTQ files were aligned to the Human Genome Reference (hg19) using Novoalign software (ver. 3.02.10; [www.novocraft.com](http://www.novocraft.com)). Following genome alignment, conversion of SAM format to BAM and duplicate removal were performed using Picard Tools (ver. 1.129; [broadinstitute.github.io/picard/](http://broadinstitute.github.io/picard/)). The Genome Analysis Toolkit, GATK (3.3) [43] was used for local realignment around indels, base recalibration and variant recalibration and genotyping. Variant annotation was performed with SnpEff [44] and GEMINI [45]. Rare variants were defined as having a frequency  $\leq 0.05\%$  among control samples. Comparisons were made with ethnically matched controls available from the database of genomics variants maintained by the Czech National Center for Medical Genomics; (<http://ncmg.cz/en>) and the publicly available genotype data from subjects of European origin sequenced in the 1000 Genomes Project, Exome Aggregation Consortium (ExAC) and The Genome Aggregation Database (gnomAD) [46]. Identified genetic variants were filtered according to the expected autosomal dominant model of disease inheritance and evaluated according to the biological relevance of corresponding candidate genes. Candidate variants were visualized in Integrative Genomics Viewer (IGV; ver. 2.3.32) [47].

### **Immunohistochemical detection of desmin and electron microscopy**

Immunohistochemistry was performed on both skeletal muscle and myocardium samples according to standard protocols to study desmin expression with the anti-Desmin antibody (mouse monoclonal antibody, clone D33 diluted 1:200; Agilent pathology solutions-Dako, USA). The antigen-antibody complexes were visualized by biotin-streptavidin detection systems (ChemMate Detection kit, Agilent pathology solutions-Dako, USA). Western blot was used to assess quantity of desmin in the myocardial samples of P2, P4 and P6. Frozen tissue was processed in a Teflon/glass homogenizer in SB Buffer (50 mM Tris pH 6.8, 50 mM DTT, 2% SDS 1xPIC), incubated for 1 hour at 37 °C, sonicated on ice and centrifuged for 5 min at 18 000g to remove non-lysed proteins. Denatured protein samples (30 µg aliquots) were separated on 10% SDS-PAGE and blotted onto a PVDF membrane. DES was visualized by incubation with monoclonal mouse anti-human desmin (Agilent pathology solutions-Dako, USA) followed by incubation with anti-mouse IgG-peroxidase antibody A8924 (Merck, USA), and detection by Clarity™ Western ECL Substrate (Bio-Rad, USA). Mitochondrial ATP synthase subunit β (ATP5B) was detected with mouse monoclonal anti-ATP5B antibody ab14730 (Abcam, USA).

For electron microscopy, specimens (approx. 1 mm<sup>3</sup>) were fixed in a glutaraldehyde solution, diluted in 2% with sodium cacodylate buffer, pH 7.4 for 6 hours at 4°C, washed in the same buffer, post-fixed for 2 hours in 1% osmium tetroxide, dehydrated through a graded acetone series and embedded in epoxy resin. Semi-thin sections (1.5 µm) were mounted on acid-cleaned slides and stained with 1% toluidine blue. Ultrathin sections were double stained with uranyl acetate and lead citrate. The grids were examined at 80 kV with transmission electron microscope.

### **Analysis of mitochondrial function in biopsies**

Protein expression was analyzed by Western Blotting as described previously [48]. Homogenates and mitochondria were denatured for 20 min at 40 °C in 2 % (v/v) mercaptoethanol, 4 % SDS (w/v), 10 mM Tris-HCl and 10 % (v/v) glycerol and proteins resolved by SDS-PAGE [49] were electro-transferred to a PVDF membrane. Specific primary antibodies were used to assess respiratory chain enzymes (NDUFA9 subunit of complex I, SDHA subunit of complex II, Core2 subunit of complex III, Cox4 subunit of complex IV, F<sub>1</sub>-subunit of complex V), mitochondrial proteins citrate synthase, adenine nucleotide translocator, phosphate translocator, porin, and antioxidative enzymes - superoxide dismutases 1 and 2, catalase, glutathione reductase. For quantitative detection, infra-red fluorescent secondary antibodies were used and the signal was quantified using Odyssey Infrared Imager (LI-COR Biosciences) and AIDA 3.21 Image Analyzer software (Raytest). Specific content of each protein antigen was expressed in AU/mg protein and the content in proband samples was calculated in percent of the mean value of the controls. In case of heart samples, the controls (hearts of organ donors that were not used for transplantation for technical or medical reasons) obtained in a previous study [25] were used.

***Mitochondrial DNA content.*** Genomic DNA was isolated and quantitative real-time PCR of two mitochondrial target sequences (16S and D-loop) and one nuclear target glyceraldehyde 3-phosphate dehydrogenase (GAPDH) was performed to quantify mitochondrial DNA (mtDNA) content relative to nuclear DNA content (16S/GAPDH and D-loop/GAPDH ratios) [50]. The mtDNA content was calculated from threshold cycle (Ct) values as  $2^{-\Delta Ct}$  where  $\Delta Ct = Ct(mtDNA) - Ct(GAPDH)$ . The  $2^{-\Delta Ct}$  value indicates the number of mtDNA copies per a haploid genome.

***Activities of respiratory chain complexes and citrate synthase.*** The activities of the mitochondrial enzymes NADH: ubiquinone oxidoreductase (complex I), succinate: coenzyme Q reductase (complex II), ubiquinol: cytochrome c oxidoreductase (complex III), cytochrome c oxidase (complex IV), NADH: cytochrome c reductase (complex I+III), succinate: cytochrome c reductase (complex II+III) were measured spectrophotometrically at 37 °C in isolated mitochondria according to Rustin et al. [51] and citrate synthase according to Srere [52]. Protein concentration was measured according to Lowry et al. [53].

***High resolution oxygraphy.***

Succinate respiration, NADH (reduced form of nicotinamide adenine dinucleotide) respiration and cytochrome *c* oxidase respiration were assessed in heart homogenates and muscle fibers using the Oxygraph-2k (OROBOROS Instruments) [48]. Muscle fibers were separated mechanically according to Kunz et al. [54], and oxygen consumption by saponin-skinned muscle fibers was determined using multiple substrate inhibitor titrations as described previously [55].

***Content of coenzyme Q10.***

Total Q10 content was determined in muscle homogenate by HPLC with UV detection at 275nm according to Mosca et al. [56]. Results were expressed as pmol of Q10/ mg of protein.

**Supplementary references:**

43. McKenna, A; Hanna, M.; Banks, E.; Sivachenko, A.; Cibulskis, K.; Kernytzky, A.; Garimella, K.; Altshuler, D.; Gabriel, S.; Daly, M.; et al. The Genome Analysis Toolkit: a MapReduce framework for analyzing next-generation DNA sequencing data. *Genome Res.* **2010**, 20, 1297–1303, doi:

10.1101/gr.107524.110.

44. Cingolani, P.; Platts, A.; Wang le, L.; Coon, M.; Nguyen, T.; Wang, L.; Land, S.J.; Lu, X.; Ruden, D.M. A program for annotating and predicting the effects of single nucleotide polymorphisms, SnpEff: SNPs in the genome of *Drosophila melanogaster* strain w1118; iso-2; iso-3. *Fly (Austin)* **2012**, *6*, 80-92, doi: 10.4161/fly.19695.
45. Paila, U.; Chapman, B.A.; Kirchner, R.; Quinlan, A.R.; GEMINI: integrative exploration of genetic variation and genome annotations. *PLoS Comput Biol.* **2013**, *9*, e1003153, doi: 10.1371/journal.pcbi.1003153.
46. Lek, M.; Karczewski, K.J.; Minikel, E.V.; Samocha, K.E.; Banks, E.; Fennell, T.; O'Donnell-Luria, A.H.; Ware, J.S.; Hill, A.J.; Cummings, B.B.; et al. Exome Aggregation Consortium. Analysis of protein-coding genetic variation in 60,706 humans. *Nature* **2016**, *536*, 285-291, doi: 10.1038/nature19057.
47. Thorvaldsdóttir, H.; Robinson, J.T.; Mesirov, J.P. Integrative Genomics Viewer (IGV): high-performance genomics data visualization and exploration. *Brief Bioinformatics* **2013**, *14*, 178–192, doi: 10.1093/bib/bbs017.
48. Pecinova, A.; Drahota, Z.; Nuskova, H.; Pecina, P.; Houstek, J. Evaluation of basic mitochondrial functions using rat tissue homogenates. *Mitochondrion* **2011**, *11*, 722-728, doi: 10.1016/j.mito.2011.05.006.
49. Schagger, H.; von Jagow, G. Tricine-sodium dodecyl sulfate-polyacrylamide gel electrophoresis for the separation of proteins in the range from 1 to 100 kDa. *Anal Biochem* **1987**, *166*, 368-379, doi: 10.1016/0003-2697(87)90587-2.
50. Havlickova Karbanova, V.; Cizkova Vrbacka, A.; Hejzlarova, K.; Nuskova, H.; Stranecky, V.; Potocka, A.; Potocka, A.; Kmoch, S.; Houstek, J. Compensatory upregulation of respiratory chain complexes iii and iv in isolated deficiency of atp synthase due to tmem70

- mutation. *Biochimica et biophysica acta*. **2012**, 1817, 1037-1043, doi: 10.1016/j.bbabi.2012.03.004.
51. Rustin, P.; Chretien, D.; Bourgeron, T.; Gérard, B.; Rötig, A.; Saudubray, J.M.; Munnich, A. Biochemical and molecular investigations in respiratory chain deficiencies. *Clin Chim Acta* **1994**, 228, 35-51, doi: 10.1016/0009-8981(94)90055-8.
52. Srere, P.A.; John, M.L. Citrate synthase : [EC 4.1.3.7. Citrate oxaloacetate-lyase (CoA-acetylating)]. *Methods in Enzymology* **1969**, Academic Press, Volume 13, 3-11.
53. Lowry, O.H.; Rosebrough, N.J.; Farr, A.L.; Randall, R.J. Protein measurement with the Folin phenol reagent. *J Biol Chem* **1951**, 193, 265-275.
54. Kunz, W.S.; Kuznetsov, A.V.; Schulze, W.; Eichhorn, K.; Schild, L.; Striggow, F.; Bohnensack, R.; Neuhof, S.; Grasshoff, H.; Neumann, H.W.; et al. Functional characterization of mitochondrial oxidative phosphorylation in saponin-skinned human muscle fibers. *Biochim Biophys Acta* **1993**, 1144, 46–53, doi: 10.1016/0005-2728(93)90029-f.
55. Wenchich, L.; Drahota, Z.; Honzik, T.; Hansikova, H.; Tesarova, M.; Zeman, J.; Houstek, J. Polarographic evaluation of mitochondrial enzymes activity in isolated mitochondria and in permeabilized human muscle cells with inherited mitochondrial defects, *Physiol Res* **2003**, 52, 781–788.
56. Mosca, F.; Fattorini, D.; Bompadre, S.; Littarru, G.P. Assay of Coenzyme Q10 in plasma by a single dilution step. *Anal Biochem*. **2002**, 305, 49-54, doi:10.1006/abio.2002.5653.

## SUPPLEMENTARY TABLES:

**Table S1:** Primers for PCR Amplification of *DES* for segregation analysis in families

| Name     | Sequence 5' - 3'         | Genomic Position       | Family |
|----------|--------------------------|------------------------|--------|
| DES_F1_U | GGCTGATGTCAGGAGGGATAC    | 2: 220283052 220283072 | F1, F2 |
| DES_F1_L | CAGAAAGAGGAGTCTGGGGTG    | 2: 220283775 220283795 | F1, F2 |
| DES_F3_U | CTGTCTCTCCTGCCTCTACCCA   | 2: 220284679 220284700 | F3     |
| DES_F3_L | GCGATCTCCTCGTTGAGAGATTCA | 2: 220285020 220285043 | F33    |
| DES_F4_U | AGCTTTCTTTGGGCTGCTAGT    | 2: 220285999-220286019 | F4, F5 |
| DES_F4_L | AGGTGGCCTTGGTTAATTCTC    | 2: 220286731 220286751 | F4, F5 |
| DES_F6_U | AACAAGCCTGTCTTGAGGGG     | 2: 220290254 220290273 | F6     |
| DES_F6_L | AGGAAGAGAAGCCCAGTCCA     | 2: 220290645 220290664 | F6     |

**Table S2:** Main clinical characteristics of probands

|                                           | <b>Proband 1</b>                                    | <b>Proband 2</b>                                                                        | <b>Proband 3</b>                                                      | <b>Proband 4</b>                                                                                                                                                                                   | <b>Proband 5</b>                                        | <b>Proband 6</b>                                                    |
|-------------------------------------------|-----------------------------------------------------|-----------------------------------------------------------------------------------------|-----------------------------------------------------------------------|----------------------------------------------------------------------------------------------------------------------------------------------------------------------------------------------------|---------------------------------------------------------|---------------------------------------------------------------------|
| Mutation of desmin                        | p.K43E                                              | p.S57L                                                                                  | p.A210D                                                               | p.Q364H                                                                                                                                                                                            | p.R406W                                                 | p.R454W                                                             |
| Age of the first examination (years)      | 17                                                  | 25                                                                                      | 47                                                                    | 47                                                                                                                                                                                                 | 25                                                      | 45                                                                  |
| Gender                                    | Male                                                | Female                                                                                  | Male                                                                  | Male                                                                                                                                                                                               | Female                                                  | Female                                                              |
| Results of family screening               | Negative                                            | Father of the proband, trifascicular block, mild elevation of creatinine phosphokinase. | Sister diagnosed with incipient DCM at 52 years (EF 51%, LVEDD 60mm). | Mother died of heart failure at 58years. Daughter of the proband- noncompacted myocardium in the apical inferolateral third of the LV (ratio 5:1 to compacted layer), preserved systolic function. | Negative                                                | Mother had cardiomyopathy, AV blockade, myopathy, died 43 years old |
| Type of cardiomyopathy                    | Biventricular form of arrhythmogenic cardiomyopathy | DCM                                                                                     | DCM                                                                   | LVNC                                                                                                                                                                                               | Right ventricular form of arrhythmogenic cardiomyopathy | Restrictive                                                         |
| Complete atrioventricular block           | No                                                  | No                                                                                      | No                                                                    | No                                                                                                                                                                                                 | Yes, dual chamber ICD (25 yrs)                          | Yes, dual chamber pacemaker (21 yrs)                                |
| Sustained VT/ resuscitated cardiac arrest | Yes (12 yrs)                                        | Yes (27 yrs)                                                                            | No                                                                    | No                                                                                                                                                                                                 | No                                                      | No                                                                  |
| Myocardial biopsy, type of samples        | Explanted heart at transplantation                  | Endomyocardial biopsy and explanted heart at transplantation                            | Endomyocardial biopsy                                                 | Explanted heart post-mortem                                                                                                                                                                        | -                                                       | Explanted heart at transplantation                                  |



|                                                                                                  |                   |                                                      |                                            |                                                        |                                          |                                 |
|--------------------------------------------------------------------------------------------------|-------------------|------------------------------------------------------|--------------------------------------------|--------------------------------------------------------|------------------------------------------|---------------------------------|
| Abnormal desmin distribution and formation of desmin-positive aggregates in cardiomyocytes by IH | Positive          | Positive                                             | Positive                                   | Negative                                               | -                                        | Positive                        |
| Pathological dense granulofilamentous inclusions in the cytoplasm of cardiomyocytes by ELMI      | Positive          | Positive                                             | -                                          | Negative                                               | -                                        | Positive                        |
| The first episode of heart failure (years)                                                       | 21                | 25                                                   | 47                                         | 48                                                     | 39                                       | 45                              |
| Weakness/atrophy upper limbs                                                                     | No                | Very slight proximal weakness                        | No                                         | Marked atrophy of muscles                              | Mild proximal and slight distal weakness | Slight proximal atrophy         |
| Weakness/atrophy lower limbs                                                                     | No                | Slight proximal weakness                             | No                                         | Marked atrophy of muscles                              | Mild proximal weakness                   | Slight proximal atrophy         |
| Bulbar symptoms                                                                                  | No                | No                                                   | No                                         | Mild bulbar speech since 62 yrs                        | Mild bulbar speech since 39 yrs          | Mild bulbar speech since 44 yrs |
| Vital capacity (L/%)                                                                             | 3,911 (81%)       | 2,671 (67%)                                          | -                                          | 3,75 (75%)                                             | 2,2 (60%)                                | 2,37 (71%)                      |
| Electromyography                                                                                 | Slightly myogenic | Normal in muscles, incipient sensoric polyneuropathy | Normal in muscles, sensoric polyneuropathy | Myogenic                                               | Myogenic                                 | Myogenic                        |
| Creatinine phosphokinase ( $\mu$ kat/l) (range 0.5-3.33)                                         | 0,54              | 0,88                                                 | 3,38                                       | 2,01                                                   | 7,22                                     | 1,57                            |
| Skeletal biopsy, type of specimen                                                                | -                 | -                                                    | -                                          | Soleus muscle biopsy + post-mortem intercostal muscles | Soleus muscle                            | Deltoid muscle                  |
| Detection of desmin-positive aggregates                                                          | -                 | -                                                    | -                                          | Negative                                               | Positive                                 | Negative                        |

|                                                                                                |                        |                        |   |                                                |                                                             |                        |
|------------------------------------------------------------------------------------------------|------------------------|------------------------|---|------------------------------------------------|-------------------------------------------------------------|------------------------|
| in skeletal myocytes by IH                                                                     |                        |                        |   |                                                |                                                             |                        |
| Pathological dense granulofilamentous inclusions in the cytoplasm of skeletal myocytes by ELMI | -                      | -                      | - | Negative                                       | Positive                                                    | Positive               |
| Significant clinical events                                                                    | Heart transplant (23y) | Heart transplant (28y) | - | Died of terminal heart failure, cachexia (64y) | Aphagia, aspiration pneumonia, died of heart failure (40 y) | Heart transplant (46y) |

**Abbreviations:** ELMI= electron microscopy, DCM= dilated cardiomyopathy, ICD= implantable cardioverter-defibrillator, IH= immunohistochemistry, LV= left ventricle, LVEDD= left-ventricular enddiastolic diameter, LVEF= left ventricular ejection fraction, LVNC= left-ventricular noncompaction cardiomyopathy, VT= ventricular tachyarrhythmia

**Table: S3:** Additional clinical, electrocardiographic, laboratory and echocardiographic data of probands

| Variable (units)               | Proband 1    |              | Proband 2    |              | Proband 3    |              | Proband 4    |              | Proband 5                                    |                      | Proband 6                               |                                         |
|--------------------------------|--------------|--------------|--------------|--------------|--------------|--------------|--------------|--------------|----------------------------------------------|----------------------|-----------------------------------------|-----------------------------------------|
| Reference range                |              |              |              |              |              |              |              |              |                                              |                      |                                         |                                         |
| Duration of follow-up (months) | 78           |              | 36           |              | 34           |              | 180          |              | 188                                          |                      | 21                                      |                                         |
|                                | BL           | Last FU      | BL           | Last FU      | BL           | Last FU      | BL           | Last FU      | BL                                           | Last FU              | BL                                      | Last FU                                 |
| Age (years)                    | 17           | 23           | 25           | 28           | 47           | 50           | 47           | 63           | 25                                           | 40                   | 45                                      | 50                                      |
| NYHA class                     | I            | IV           | III          | III          | IV           | III          | II           | IV           | II                                           | III                  | III-IV                                  | IV                                      |
| Rhythm                         | Sinus rhythm | Sinus rhythm | Sinus rhythm | Sinus rhythm | Sinus rhythm | Sinus rhythm | Sinus rhythm | Sinus rhythm | Sinus rhythm, III. degree AV block intermit. | AV sequential pacing | AV sequential biventricular stimulation | AV sequential biventricular stimulation |
| PQ interval (ms) (120-200)     | 174          | 198          | 162          | 176          | 170          | 180          | 162          | 164          | 220                                          | -                    | -                                       | -                                       |
| QRS duration (ms) (80-110)     | 100          | 104          | 100          | 114          | 120          | 130          | 98           | 114          | 130                                          | 122                  | 130                                     | 156                                     |

|                                                              |                  |                 |                 |                 |     |     |    |                 |                 |       |                 |                 |
|--------------------------------------------------------------|------------------|-----------------|-----------------|-----------------|-----|-----|----|-----------------|-----------------|-------|-----------------|-----------------|
| Serum creatinine (μmol/l)<br>(60-106)                        | 73               | 87,2            | 92              | 92,1            | 82  | 87  | -  | 104             | 56,2            | 43,4  | 63,8            | 92              |
| B-type natriuretic peptide (ng/l)<br>(10-73)                 | -                | 1133            | 621             | 1374            | 307 | 558 | -  | 3403            | -               | 735,6 | 1137,5          | 2308            |
| Cardiac troponins<br>(I 0-0.03 μg/l,<br>T 0-14 ng/l)         | Troponin I <0.03 | Hs TNT<br>10,71 | Hs TNT<br>168,3 | Hs TNT<br>318,6 | -   | -   | -  | Hs TNT<br>25,02 | Troponin I 0,13 | -     | Hs TNT<br>37,21 | Hs TNT<br>34,95 |
| LVEDD (mm)<br>(males 42-59,<br>females 39-53)                | 51               | 59              | 60              | 66              | 70  | 73  | 64 | 72              | 47              | 53    | 47              | 55              |
| Left ventricular ejection fraction (%)<br>(55-70)            | 60               | 20-25           | 26              | 20-25           | 16  | 22  | 25 | 24              | 55-60           | 45-50 | 30-35           | 20-25           |
| Interventricular septum (mm)<br>(males 6-10,<br>females 6-9) | 9                | 10              | 8               | 8               | 8   | 10  | 9  | 7               | 12              | 7     | 8               | 7               |

|                                                  |      |                    |          |                   |      |      |      |          |         |                    |        |                    |
|--------------------------------------------------|------|--------------------|----------|-------------------|------|------|------|----------|---------|--------------------|--------|--------------------|
| Posterior wall (mm)<br>(males 6-10, females 6-9) | 8    | 7                  | 10       | 10                | 8    | 9    | 9    | 6        | 11      | 7                  | 8      | 6                  |
| E/A ratio                                        | 1,8  | 0,8                | 4,1      | -                 | 2,21 | 2,27 | -    | 3,0      | -       | 1,9                | -      | -                  |
| E/Em ratio (<8)                                  | -    | 6,5                | 12       | 11,8              | 8,7  | 8,5  | -    | 20,6     | -       | 15                 | 10,9   | 9,6                |
| Restrictive mitral pattern                       | no   | No                 | Yes      | No                | yes  | yes  | -    | Yes      | -       | no                 | No     | Yes                |
| Mitral regurgitation (scale) (1-4)               | 1/4  | 1/4                | 3/4      | 2-3/4 (Mitraclip) | 2/4  | 2/4  | 2/4  | 3-4/4    | 1/4 max | 1/4                | 2/4    | 2/4                |
| Left atrium diameter (mm) (27-38)                | 32   | 29                 | 46       | 47                | 51   | 57   | 39   | 46       | 35      | 43                 | 46     | 46                 |
| LAVI (cm3/m2) (16-28)                            | -    | 20,9               | 60,9     | 57,1              | 53   | 50   | -    | 104,4    | -       | 46,5               | 70,4   | 78,2               |
| RVD1 (mm) (20-28)                                | -    | 55                 | 31       | 35                | 27   | 25   | -    | 52       | 42      | 46                 | 27     | 46                 |
| Right ventricular systolic                       | None | Moderate to severe | Moderate | None              | None | None | None | Moderate | Mild    | Moderate to severe | Severe | Moderate to severe |

|                                         |        |                         |                         |                          |                |                |         |                         |         |                         |            |                        |
|-----------------------------------------|--------|-------------------------|-------------------------|--------------------------|----------------|----------------|---------|-------------------------|---------|-------------------------|------------|------------------------|
| dysfunction (scale)                     |        |                         |                         |                          |                |                |         |                         |         |                         |            |                        |
| Right ventricular ejection fraction (%) | Normal | TAPSE 14 mm, TDI 7 cm/s | TAPSE 18 mm, TDI 9 cm/s | TAPSE 18 mm, TDI 10 cm/s | - (TAPSE 22mm) | - (TAPSE 19mm) | -       | TAPSE 11 mm, TDI 6 cm/s | -       | TAPSE 11 mm, TDI 9 cm/s | TDI 6 cm/s | TAPSE 7 mm, TDI 6 cm/s |
| Tricuspidal regurgitation (scale)       | 1/4    | ¾                       | 1/4                     | 2/4                      | 1/4            | 1              | 1/4 max | 2/4                     | 1/4 max | 2/4                     | 2/4        | 1/4                    |

**Abbreviations:** Hs TNT= high sensitivity troponin T, LAVI= left atrium volume index, NYHA= New York Heart Association functional class, RVD1= right ventricular diastolic diameter

**Table S4:** Rare variants of non-desmin genes in probands, frequency in Exac database less than 0,00001.

**Proband 1**

| Chr | Position  | Ref | Alt | Gene   | Accession      | cDNA change | AAA change |
|-----|-----------|-----|-----|--------|----------------|-------------|------------|
| 1   | 984378    | G   | A   | AGRN   | NM_198576.3    | c.4237G>A   | G1413S     |
| 1   | 94520771  | G   | C   | ABCA4  | NM_000350.2    | c.2483C>G   | P828R      |
| 1   | 156874735 | G   | A   | PEAR1  | NM_001080471.1 | c.206+91G>A |            |
| 4   | 861088    | G   | T   | GAK    | NM_005255.3    | c.2528C>A   | P843H      |
| 5   | 92920919  | C   | G   | NR2F1  | NM_005654.5    | c.190C>G    | P64A       |
| 5   | 171318519 | C   | G   | FBXW11 | NM_012300.2    | c.741G>C    | Q247H      |
| 6   | 153077337 | C   | A   | VIP    | NM_003381.3    | c.404C>A    | T135N      |
| 6   | 160494990 | A   | G   | IGF2R  | NM_000876.3    | c.5149A>G   | I1717V     |
| 8   | 22052098  | T   | G   | BMP1   | NM_006129.4    | c.1438T>G   | F480V      |
| 11  | 59611527  | G   | T   | GIF    | NM_005142.2    | c.81C>A     | S27=       |
| 11  | 75111821  | G   | A   | RPS3   | NM_001260506.1 | c.114G>A    | E38=       |
| 11  | 123597390 | C   | T   | ZNF202 | NM_003455.3    | c.1262G>A   | G421E      |
| 12  | 18889224  | T   | G   | PLCZ1  | NM_033123.3    | c.66A>C     | E22D       |
| 12  | 49431411  | C   | G   | KMT2D  | NM_003482.3    | c.9728G>C   | S3243T     |
| 18  | 3193959   | G   | A   | MYOM1  | NM_003803.3    | c.291-3C>T  |            |

**Proband 2**

| Chr | Position  | Ref | Alt | Gene  | Accession      | cDNA change | AAA change   |
|-----|-----------|-----|-----|-------|----------------|-------------|--------------|
| 1   | 32852373  | T   | C   | BSDC1 | NM_001143888.2 | c.189+7A>G  |              |
| 1   | 109547295 | G   | C   | WDR47 | NM_001142550.1 | c.1197C>G   | p.Ile399Met  |
| 1   | 111690658 | C   | A   | CEPT1 | NM_001007794.2 | c.322C>A    | p.Pro108Thr  |
| 1   | 152080501 | A   | T   | TCHH  | NM_007113.3    | c.5192T>A   | p.Leu1731Gln |
| 1   | 152325588 | A   | T   | FLG2  | NM_001014342.2 | c.4674T>A   | p.His1558Gln |
| 2   | 27466112  | A   | G   | CAD   | NM_004341.4    | c.6527A>G   | p.Lys2176Arg |
| 2   | 217005962 | A   | G   | XRCC5 | NM_021141.3    | c.1396A>G   | p.Lys466Glu  |

|    |           |    |   |          |                |               |                   |
|----|-----------|----|---|----------|----------------|---------------|-------------------|
| 2  | 223559960 | CA | C | MOGAT1   | NM_058165.2    | c.806delA     | p.Gln269ArgfsTer6 |
| 3  | 100499018 | T  | C | ABI3BP   | NM_015429.3    | c.2065A>G     | p.Arg689Gly       |
| 4  | 47951911  | C  | G | CNGA1    | NM_001142564.1 | c.445G>C      | p.Glu149Gln       |
| 4  | 129083409 | A  | G | LARP1B   | NM_018078.3    | c.1585A>G     | p.Thr529Ala       |
| 5  | 132161121 | G  | A | SHROOM1  | NM_133456.2    | c.712C>T      | p.Pro238Ser       |
| 6  | 32094036  | G  | T | ATF6B    | NM_004381.4    | c.343-7C>A    |                   |
| 6  | 44900430  | C  | T | SUPT3H   | NM_003599.3    | c.872G>A      | p.Arg291Gln       |
| 6  | 78471065  | A  | G | MEI4     | NM_001282136.2 | c.451A>G      | p.Met151Val       |
| 6  | 90392951  | A  | C | MDN1     | NM_014611.2    | c.12002T>G    | p.Leu4001Trp      |
| 7  | 1515607   | C  | G | INTS1    | NM_001080453.2 | c.5479G>C     | p.Ala1827Pro      |
| 7  | 48353932  | T  | C | ABCA13   | NM_152701.4    | c.9785T>C     | p.Met3262Thr      |
| 7  | 83764200  | G  | T | SEMA3A   | NM_006080.2    | c.180C>A      | p.Phe60Leu        |
| 7  | 100731045 | G  | C | TRIM56   | NM_030961.2    | c.452G>C      | p.Gly151Ala       |
| 7  | 103363638 | T  | A | RELN     | NM_173054.2    | c.754A>T      | p.Ile252Phe       |
| 7  | 105636728 | G  | A | CDHR3    | NM_152750.4    | c.641G>A      | p.Gly214Glu       |
| 7  | 156742969 | G  | C | NOM1     | NM_138400.1    | c.538G>C      | p.Glu180Gln       |
| 8  | 2050503   | C  | T | MYOM2    | NM_003970.3    | c.2666C>T     | p.Ala889Val       |
| 8  | 27729520  | G  | T | SCARA5   | NM_173833.5    | c.1419C>A     | p.Ser473Arg       |
| 8  | 95952164  | C  | T | TP53INP1 | NM_033285.3    | c.397G>A      | p.Ala133Thr       |
| 8  | 107719256 | C  | T | OXR1     | NM_001198532.1 | c.1510C>T     | p.Arg504Cys       |
| 9  | 101983378 | G  | T | ALG2     | NM_033087.3    | c.348+451C>A  |                   |
| 9  | 114860936 | C  | A | SUSD1    | NM_022486.4    | c.1288G>T     | p.Val430Phe       |
| 9  | 131085558 | G  | A | COQ4     | NM_016035.4    | c.202+132G>A  |                   |
| 10 | 25273728  | A  | G | ENKUR    | NM_145010.3    | c.701T>C      | p.Met234Thr       |
| 10 | 112262557 | G  | A | DUSP5    | NM_004419.3    | c.458G>A      | p.Ser153Asn       |
| 10 | 134040354 | T  | C | STK32C   | NM_173575.3    | c.589A>G      | p.Ile197Val       |
| 11 | 32997064  | T  | A | QSER1    | NM_001076786.2 | c.5067+175T>A |                   |
| 11 | 66114257  | C  | T | B4GAT1   | NM_006876.2    | c.760G>A      | p.Ala254Thr       |
| 11 | 108544261 | A  | G | DDX10    | NM_004398.3    | c.247+7A>G    |                   |
| 11 | 110124777 | T  | C | RDX      | NM_001260493.1 | c.853A>G      | p.Met285Val       |



|    |           |   |   |             |                |             |             |
|----|-----------|---|---|-------------|----------------|-------------|-------------|
| 12 | 57963142  | G | T | KIF5A       | NM_004984.3    | c.923G>T    | p.Ser308Ile |
| 12 | 96406993  | G | A | LTA4H       | NM_000895.2    | c.1352C>T   | p.Ser451Phe |
| 12 | 101790158 | C | G | ARL1        | NM_001177.5    | c.515+19G>C |             |
| 14 | 20978732  | G | C | RNASE10     | NM_001012975.1 | c.102G>C    | p.Leu34Phe  |
| 15 | 44581522  | G | C | CASC4       | NM_138423.3    | c.295G>C    | p.Glu99Gln  |
| 16 | 4457525   | G | A | CORO7-PAM16 | NM_001201479.1 | c.464C>T    | p.Ala155Val |
| 16 | 68379576  | A | G | PRMT7       | NM_019023.3    | c.928-2A>G  |             |
| 16 | 84228695  | C | T | ADAD2       | NM_001145400.1 | c.628C>T    | p.Gln210Ter |
| 17 | 27013730  | C | G | SUPT6H      | NM_003170.4    | c.2623C>G   | p.Gln875Glu |
| 17 | 73143689  | A | C | JPT1        | NM_001002032.2 | c.259T>G    | p.Ser87Ala  |
| 19 | 11289243  | T | C | KANK2       | NM_015493.6    | c.1403A>G   | p.Glu468Gly |
| 19 | 58867968  | A | C | ZNF497      | NM_001207009.1 | c.1034T>G   | p.Leu345Arg |
| 20 | 2398051   | C | T | TGM6        | NM_198994.2    | c.1510C>T   | p.Pro504Ser |
| 22 | 21133678  | T | G | SERPIND1    | NM_000185.3    | c.78T>G     | p.Asp26Glu  |
| X  | 53279689  | T | C | IQSEC2      | NM_001111125.2 | c.2069A>G   | p.Asn690Ser |
| X  | 154528117 | G | T | CLIC2       | NM_001289.5    | c.274C>A    | p.Gln92Lys  |

### **Proband 3**

| <b>Chr</b> | <b>Position</b> | <b>Ref</b> | <b>Alt</b> | <b>Gene</b> | <b>Accesion</b> | <b>cDNA change</b> | <b>AAA change</b> |
|------------|-----------------|------------|------------|-------------|-----------------|--------------------|-------------------|
| 1          | 162337149       | C          | G          | NOS1AP      | NM_014697.2     | c.1413C>G          | p.Asp471Glu       |
| 1          | 243437858       | A          | G          | SDCCAG8     | NM_006642.4     | c.320A>G           | p.His107Arg       |
| 2          | 32249171        | G          | A          | DPY30       | NM_032574.3     | c.*82C>T           |                   |
| 2          | 219537459       | A          | G          | STK36       | NM_015690.4     | c.-89-5A>G         |                   |
| 3          | 46245507        | C          | T          | CCR1        | NM_001295.2     | c.298G>A           | p.Val100Ile       |
| 4          | 39506886        | G          | T          | UGDH        | NM_003359.3     | c.1142C>A          | p.Ser381Tyr       |
| 5          | 155508          | C          | G          | PLEKHG4B    | NM_052909.4     | c.2158C>G          | p.Gln720Glu       |
| 7          | 1517384         | C          | T          | INTS1       | NM_001080453.2  | c.4814+5G>A        |                   |
| 7          | 6085740         | T          | C          | EIF2AK1     | NM_014413.3     | c.592A>G           | p.Ile198Val       |
| 7          | 11441471        | C          | G          | THSD7A      | NM_015204.2     | c.4362G>C          | p.Glu1454Asp      |
| 7          | 48353945        | G          | T          | ABCA13      | NM_152701.4     | c.9798G>T          | p.Leu3266Phe      |

|    |           |    |   |         |                |               |              |
|----|-----------|----|---|---------|----------------|---------------|--------------|
| 8  | 113657433 | C  | T | CSMD3   | NM_198123.1    | c.3215G>A     | p.Arg1072Lys |
| 9  | 37518195  | G  | A | FBXO10  | NM_012166.2    | c.2441C>T     | p.Thr814Ile  |
| 11 | 20078073  | C  | G | NAV2    | NM_001244963.1 | c.4901-3C>G   |              |
| 11 | 32438969  | AC | A | WT1     | NM_024426.5    | c.965+154delG |              |
| 11 | 119144648 | G  | A | CBL     | NM_005188.3    | c.661G>A      | p.Ala221Thr  |
| 12 | 121603236 | A  | G | P2RX7   | NM_002562.5    | c.610A>G      | p.Thr204Ala  |
| 13 | 99378459  | T  | C | SLC15A1 | NM_005073.3    | c.163A>G      | p.Ile55Val   |
| 15 | 33446640  | G  | A | FMN1    | NM_001277313.1 | c.476C>T      | p.Pro159Leu  |
| 16 | 2349398   | C  | T | ABCA3   | NM_001089.2    | c.1741+6G>A   |              |
| 18 | 10752771  | C  | G | PIEZO2  | NM_022068.3    | c.3955G>C     | p.Gly1319Arg |
| 19 | 1438627   | A  | G | RPS15   | NM_001018.4    | c.4-179A>G    |              |

#### **Proband 4**

| <b>Chr</b> | <b>Position</b> | <b>Ref</b> | <b>Alt</b> | <b>Gene</b> | <b>Accession</b>  | <b>cDNA change</b> | <b>AAA change</b> |
|------------|-----------------|------------|------------|-------------|-------------------|--------------------|-------------------|
| 1          | 34066602        | G          | T          | CSMD2       | NM_052896.4       | c.6725C>A          | p.Pro2242Gln      |
| 1          | 235826323       | C          | T          | LYST        | NM_000081.3       | c.11323G>A         | p.Val3775Met      |
| 2          | 29296732        | A          | T          | PCARE       | NM_001029883.2    | c.396T>A           | p.Asp132Glu       |
| 2          | 58388744        | A          | AT         | FANCL       | NM_001114636.1    | c.947dupA          | p.Tyr316Ter       |
| 3          | 58319318        | T          | G          | PXK         | NM_017771.4       | c.102+501T>G       |                   |
| 3          | 113775377       | T          | A          | KIAA1407    | NM_020817.1       | c.-64A>T           |                   |
| 5          | 134190813       | A          | G          | C5orf24     | NM_001135586.1    | c.223A>G           | p.Lys75Glu        |
| 5          | 172447309       | G          | A          | ATP6V0E1    | NM_003945.3       | c.221G>A           | p.Trp74Ter        |
| 6          | 33248302        | G          | A          | WDR46       | NM_005452.5       | c.1430-3C>T        |                   |
| 6          | 90403863        | A          | G          | MDN1        | NM_014611.2       | c.9811T>C          | p.Ser3271Pro      |
| 7          | 8198233         | A          | G          | ICA1        | NM_022307.2       | c.629T>C           | p.Met210Thr       |
| 7          | 101960927       | A          | T          | SH2B2       | ENST00000536178.1 | c.1642A>T          | p.Ile548Phe       |
| 8          | 99140731        | G          | A          | POP1        | NM_001145861.1    | c.449G>A           | p.Arg150His       |
| 8          | 135649952       | A          | G          | ZFAT        | NM_020863.3       | c.200T>C           | p.Phe67Ser        |
| 8          | 141294090       | C          | G          | TRAPPC9     | NM_031466.7       | c.2306G>C          | p.Ser769Thr       |
| 8          | 145580580       | G          | A          | FBXL6       | NM_012162.3       | c.772-5C>T         |                   |

|    |           |    |   |         |                |                |                    |
|----|-----------|----|---|---------|----------------|----------------|--------------------|
| 9  | 123912675 | G  | A | CNTRL   | NM_007018.4    | c.3877G>A      | p.Val1293Met       |
| 10 | 126186634 | TG | T | LHPP    | NM_022126.3    | c.564delG      | p.Lys189SerfsTer14 |
| 11 | 3690528   | G  | A | NA10    | NM_020402.3    | c.260C>T       | p.Thr87Ile         |
| 12 | 46320573  | C  | G | SCAF11  | NM_004719.2    | c.2911G>C      | p.Ala971Pro        |
| 12 | 53186539  | C  | T | KRT3    | NM_057088.2    | c.979G>A       | p.Ala327Thr        |
| 14 | 23885487  | C  | G | MYH7    | NM_000257.3    | c.4679G>C      | p.Arg1560Pro       |
| 14 | 104026993 | T  | A | BAG5    | NM_001015049.2 | c.632A>T       | p.Gln211Leu        |
| 15 | 43816447  | G  | C | MAP1A   | NM_002373.5    | c.2776G>C      | p.Glu926Gln        |
| 17 | 46114238  | G  | T | COPZ2   | NM_016429.3    | c.162C>A       | p.Asp54Glu         |
| 17 | 74078723  | C  | A | ZACN    | NM_180990.3    | c.1228C>A      | p.Pro410Thr        |
| 18 | 11852076  | C  | T | CHMP1B  | NM_020412.4    | c.566C>T       | p.Ser189Phe        |
| 19 | 1235324   | G  | A | CBARP   | NM_152769.2    | c.310+176C>T   |                    |
| 19 | 6392325   | G  | A | GTF2F1  | NM_002096.2    | c.60-340C>T    |                    |
| 19 | 10602359  | C  | A | KEAP1   | NM_203500.1    | c.1219G>T      | p.Ala407Ser        |
| 19 | 11352168  | C  | A | DOCK6   | NM_018687.6    | c.507C>A       | p.His169Gln        |
| 19 | 56813432  | T  | C | EDDM13  | NM_001322061.1 | c.-32+11220A>G |                    |
| 20 | 4883179   | C  | T | SLC23A2 | NM_203327.1    | c.233G>A       | p.Ser78Asn         |
| 20 | 61986941  | C  | A | NA4     | NM_000744.6    | c.383+386G>T   |                    |
| 20 | 62896611  | G  | A | PCMTD2  | NM_018257.2    | c.411G>A       | p.Lys137=          |
| 21 | 16338964  | G  | A | NRIP1   | NM_003489.3    | c.1550C>T      | p.Thr517Ile        |
| 22 | 38121487  | G  | C | TRIOBP  | NM_001039141.2 | c.2924G>C      | p.Arg975Pro        |

### **Proband 5**

| Chr | Position  | Ref | Alt | Gene     | Accession      | cDNA change | AAA change   |
|-----|-----------|-----|-----|----------|----------------|-------------|--------------|
| 1   | 27099831  | G   | A   | ARID1A   | NM_006015.5    | c.3716-6G>A |              |
| 1   | 46657778  | A   | G   | POMGNT1  | NM_001243766.1 | c.1531T>C   | p.Tyr511His  |
| 2   | 11362224  | C   | T   | ROCK2    | NM_004850.4    | c.1084G>A   | p.Asp362Asn  |
| 2   | 37480372  | G   | A   | PRKD3    | NM_005813.4    | c.2621C>T   | p.Pro874Leu  |
| 2   | 239237420 | G   | A   | TRAF3IP1 | NM_015650.3    | c.448G>A    | p.Asp150Asn  |
| 3   | 46003741  | T   | C   | FYCO1    | NM_024513.3    | c.3413A>G   | p.Glu1138Gly |

|    |           |   |   |         |                |             |              |
|----|-----------|---|---|---------|----------------|-------------|--------------|
| 3  | 100988393 | G | A | IMPG2   | NM_016247.3    | c.853C>T    | p.Pro285Ser  |
| 4  | 25673262  | A | C | SLC34A2 | NM_006424.2    | c.967A>C    | p.Thr323Pro  |
| 4  | 79186240  | C | T | FRAS1   | NM_025074.6    | c.665C>T    | p.Ser222Phe  |
| 6  | 31599278  | G | A | PRRC2A  | NM_004638.3    | c.2828G>A   | p.Gly943Glu  |
| 7  | 21628848  | G | A | DNAH11  | NM_001277115.1 | c.1996G>A   | p.Ala666Thr  |
| 9  | 37541495  | C | T | FBXO10  | NM_012166.2    | c.271G>A    | p.Asp91Asn   |
| 10 | 61830422  | T | C | ANK3    | NM_020987.4    | c.10217A>G  | p.Asp3406Gly |
| 11 | 6292649   | G | T | CCKBR   | NM_176875.3    | c.1220G>T   | p.Arg407Leu  |
| 11 | 67803807  | G | A | NDUFS8  | NM_002496.3    | c.460G>A    | p.Gly154Ser  |
| 11 | 111896976 | G | C | DLAT    | NM_001931.4    | c.334G>C    | p.Glu112Gln  |
| 11 | 128786413 | C | G | KCNJ5   | NM_000890.4    | c.1047C>G   | p.Asn349Lys  |
| 12 | 65857005  | C | T | MSRB3   | NM_001193461.1 | c.461C>T    | p.Ser154Leu  |
| 14 | 92472483  | T | C | TRIP11  | NM_004239.4    | c.1837A>G   | p.Ile613Val  |
| 16 | 46729942  | T | C | ORC6    | NM_014321.3    | c.576T>C    | p.Asp192=    |
| 17 | 60108953  | C | A | MED13   | NM_005121.2    | c.861G>T    | p.Gln287His  |
| 18 | 39618821  | G | C | PIK3C3  | NM_002647.3    | c.2038+7G>C |              |
| 19 | 35829221  | A | G | CD22    | NM_001771.3    | c.1136A>G   | p.Glu379Gly  |
| 22 | 36691653  | T | A | MYH9    | NM_002473.5    | c.3383A>T   | p.Asn1128Ile |

### **Proband 6**

| <b>Chr</b> | <b>Position</b> | <b>Ref</b> | <b>Alt</b> | <b>Gene</b> | <b>Accession</b> | <b>cDNA change</b> | <b>AAA change</b> |
|------------|-----------------|------------|------------|-------------|------------------|--------------------|-------------------|
| 1          | 24124660        | T          | G          | GALE        | NM_001127621.1   | c.298A>C           | p.Lys100Gln       |
| 2          | 71838670        | T          | C          | DYSF        | NM_001130987.1   | c.4135T>C          | p.Cys1379Arg      |
| 2          | 215851347       | A          | G          | ABCA12      | NM_173076.2      | c.4082T>C          | p.Val1361Ala      |
| 3          | 49162043        | A          | G          | LAMB2       | NM_002292.3      | c.3112T>C          | p.Cys1038Arg      |
| 3          | 58121794        | G          | A          | FLNB        | NM_001164317.1   | c.4853G>A          | p.Arg1618His      |
| 5          | 140011796       | T          | C          | CD14        | NM_000591.3      | c.773A>G           | p.His258Arg       |
| 6          | 43013047        | G          | A          | CUL7        | NM_001168370.1   | c.3208C>T          | p.Arg1070Cys      |
| 7          | 2054220         | C          | T          | MAD1L1      | NM_001013837.1   | c.1276G>A          | p.Glu426Lys       |
| 14         | 79434660        | G          | A          | NRXN3       | NM_004796.5      | c.1994G>A          | p.Arg665Gln       |

|    |           |   |   |         |                |                |              |
|----|-----------|---|---|---------|----------------|----------------|--------------|
| 14 | 102471451 | G | A | DYNC1H1 | NM_001376.4    | c.5311G>A      | p.Gly1771Arg |
| 15 | 43023447  | G | A | CDAN1   | NM_138477.4    | c.1822C>T      | p.Pro608Ser  |
| 16 | 11643450  | G | A | LITAF   | NM_001136472.1 | c.*43C>T       |              |
| 17 | 4718764   | C | T | PLD2    | NM_002663.4    | c.1174-7C>T    |              |
| 19 | 11557116  | C | T | PRKCSH  | NM_002743.3    | c.713C>T       | p.Pro238Leu  |
| 19 | 19339050  | C | T | NCAN    | NM_004386.2    | c.2621C>T      | p.Thr874Met  |
| 19 | 45996636  | C | T | RTN2    | NM_005619.4    | c.815G>A       | p.Gly272Glu  |
| 19 | 46376253  | A | C | FOXA3   | NM_004497.2    | c.990A>C       | p.Glu330Asp  |
| 19 | 52272353  | G | A | FPR2    | NM_001005738.1 | c.442G>A       | p.Gly148Arg  |
| 20 | 57430039  | C | T | GNAS    | NM_016592.3    | c.*42+14098C>T |              |
| 22 | 38524271  | C | A | PLA2G6  | NM_003560.3    | c.1348+5G>T    |              |
